# Supplementary material
Source: Springer Nature journal article supplement (https://www.springermedizin.de/resource/supplementary/12967_2013_1786_MOESM1_ESM.pdf/9574878)

# Supplemental Figure 1.

**A**

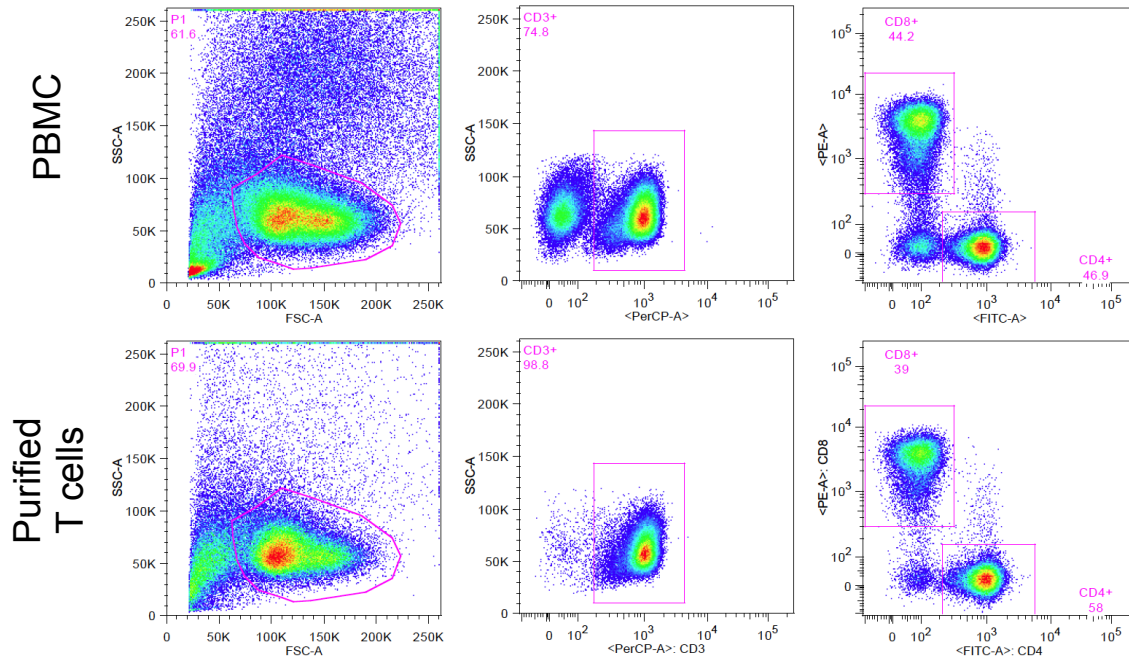

**B**

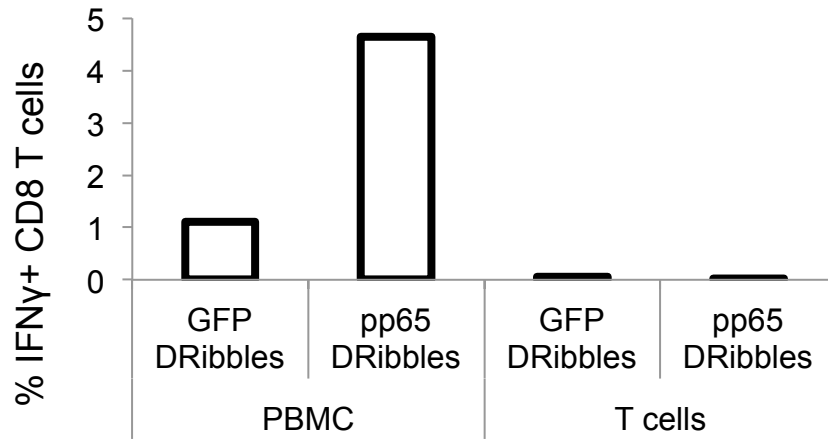

**C**

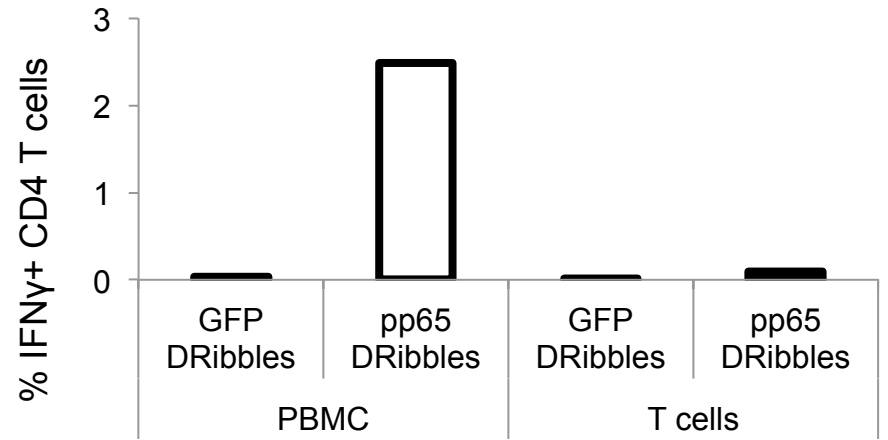

Supplement: MOESM1 [file 9574878]
